# Supplementary material for: Applications of Machine Learning in Human Microbiome Studies: A Review on Feature Selection, Biomarker Identification, Disease Prediction and Treatment
Source: Front Microbiol. 2021 Feb 19;12:634511. doi: 10.3389/fmicb.2021.634511 (PMC7962872; doi:10.3389/fmicb.2021.634511)
Supplement: Supplementary file 1 [file Data_Sheet_1.xlsx]

## Sheet: SUMMARY
Title	Authors	ML Method	Input data type	Disease	MESH Term	Clinical Comments	Original Dataset	doi	date	link	Methodology
MetaNN: accurate classification of host phenotypes from metagenomic data using neural networks	Chieh Lo,Radu Marculescu	Neural Networks, clustering,feature construction,supervised learning,unsupervised methods	16s rRNA, OTU tables	inflammatory bowel disease,esophagus disease	Inflammatory Bowel Diseases; Esophagitis; Barrett Esophagus; Adenocarcinoma Of Esophagus; Body Composition	Diverse data types from 8 studies, 2 of them with clinical implications & comparison between ML methods.	Cell Host Microbe. 2014;15(3):382–92.; New York: Springer; 2013. p. 1–5.	10.1186/s12859-019-2833-2	2019	https://link.springer.com/article/10.1186/s12859-019-2833-2	PRISMA
Learning Microbial Community Structures with Supervised and Unsupervised Non-negative Matrix Factorization	Yun Cai,Hong Gu,Toby Kenney	hierarchical multi-label classification,link prediction	16S rRNA, shotgun metagenomic	obesity	Inflammatory Bowel Diseases; Body Composition	Create a method and IBD classification	Nature 2010, 464(7285):59–65	10.1186/s40168-017-0323-1	2017	https://link.springer.com/article/10.1186/s40168-017-0323-1	PRISMA
Alignment-free supervised classification of metagenomes by recursive SVM.	Cui Hongfei, Zhang Xuegong	clustering,dimensionality reduction,feature selection,hierarchical multi-label classification,supervised learning,unsupervised methods	shotgun metagenomics	inflammatory bowel disease	Inflammatory Bowel Diseases	Create a method and IBD classification	Nature 2010, 464(7285):59–65	10.1186/1471-2164-14-641	2013/09/22	https://www.ncbi.nlm.nih.gov/pubmed/24053649	PRISMA
Multi-omics differentially classify disease state and treatment outcome in pediatric Crohn's disease.	Douglas Gavin M, Hansen Richard, Jones Casey M A, Dunn Katherine A, Comeau André M, Bielawski Joseph P, Tayler Rachel, El-Omar Emad M, Russell Richard K, Hold Georgina L, Langille Morgan G I, Van Limbergen Johan	Random forest	16s rRNA, shotgun metagenomic	Crohn's Disease (CD)	Inflammatory Bowel Diseases	Classification & treatment response	own data	10.1186/s40168-018-0398-3	2018/01/15	https://www.ncbi.nlm.nih.gov/pubmed/29335008	PRISMA
MetaPheno: A critical evaluation of deep learning and machine learning in metagenome-based disease prediction.	LaPierre Nathan, Ju Chelsea J-T, Zhou Guangyu, Wang Wei	feature construction,link prediction	16s rRNA, OTU tables	obesity	Obesity; Diabetes Mellitus, Type 2; Inflammatory Bowel Diseases; Liver Cirrhosis	Compare ML methods, classification	Nature 500 (7464) (2013) 541.; Nature 490 (7418) (2012) 55.; Nature volume 513, pages59–64(2014); Nature 2010, 464(7285):59–65	10.1016/j.ymeth.2019.03.003	2019/03/16	https://www.ncbi.nlm.nih.gov/pubmed/30885720	PRISMA
Metagenomics Biomarkers Selected for Prediction of Three Different Diseases in Chinese Population.	Wu Honglong, Cai Lihua, Li Dongfang, Wang Xinying, Zhao Shancen, Zou Fuhao, Zhou Ke	dimensionality reduction,feature selection,hierarchical multi-label classification,regression	shotgun metagenomics		Diabetes Mellitus, Type 2; Arthritis, Rheumatoid; Liver Cirrhosis	Pipeline classification	own data	10.1155/2018/2936257	2018/01/11	https://www.ncbi.nlm.nih.gov/pubmed/29568746	PRISMA
Machine Learning Meta-analysis of Large Metagenomic Datasets: Tools and Biological Insights.	Pasolli Edoardo, Truong Duy Tin, Malik Faizan, Waldron Levi, Segata Nicola	dimensionality reduction,feature selection,transfer learning	shotgun metagenomics		Liver Cirrhosis; Colorectal Neoplasms; Inflammatory Bowel Diseases; Obesity; Diabetes Mellitus, Type 2	Disease Prediction, compare ML methods	Nature 2014; 513(7516):59–64; Mol Syst Biol. 2014; 10(11):766; Nature 2010, 464(7285):59–65; Nature 500 (7464) (2013) 541.; Nature 490 (7418) (2012) 55; Nature 2013; 498(7452):99–103;	10.1371/journal.pcbi.1004977	2016/07/11	https://www.ncbi.nlm.nih.gov/pubmed/27400279	PRISMA
Phy-PMRFI: Phylogeny-Aware Prediction of Metagenomic Functions Using Random Forest Feature Importance.	Wassan Jyotsna Talreja, Wang Haiying, Browne Fiona, Zheng Huiru	dimensionality reduction,feature selection,link prediction	16s rRNA		Body Composition			10.1109/TNB.2019.2912824	2019/04/24	https://www.ncbi.nlm.nih.gov/pubmed/31021803	PRISMA
Dynamic interaction network inference from longitudinal microbiome data	Jose Lugo-Martinez,Daniel Ruiz-Perez,Giri Narasimhan,Ziv Bar-Joseph	link prediction,network inference,time-series analysis	16s rRNA	gastrointestinal disease	Infant, Premature; Menstruation; Pregnant Women	Create a computational pipeline microbiome time series	Proc Natl Acad Sci. 2014;111(34):12522–7.; Sci Transl Med. 2012;4(132):132–52.; Proc Natl Acad Sci. 2015;112(35):11060–5	10.1186/s40168-019-0660-3	2019	https://link.springer.com/article/10.1186/s40168-019-0660-3	PRISMA
A Machine Learning Approach for Using the Postmortem Skin Microbiome to Estimate the Postmortem Interval.	Johnson Hunter R, Trinidad Donovan D, Guzman Stephania, Khan Zenab, Parziale James V, DeBruyn Jennifer M, Lents Nathan H	regression	16s rRNA	skin disease	Postmortem Changes	Postmortem intervals	own data	10.1371/journal.pone.0167370	2016/12/22	https://www.ncbi.nlm.nih.gov/pubmed/28005908	PRISMA
Fizzy: feature subset selection for metagenomics.	Ditzler Gregory, Morrison J Calvin, Lan Yemin, Rosen Gail L	dimensionality reduction,feature selection	OTU tables, shotgun metagenomics		Diet; Inflammatory Bowel Diseases	Create software and algorithm comparative	The American Gut Project. Web. 2014.; Nature 2010, 464(7285):59–65	10.1186/s12859-015-0793-8	2015/11/04	https://www.ncbi.nlm.nih.gov/pubmed/26538306	PRISMA
Predicting the Metagenomics Content with Multiple CART Trees	Dante Travisany,Diego Galarce,Alejandro Maass,Rodrigo Assar	Semi-supervised methods,clustering	shotgun metagenomics			Classification	Nature 449(7164), 804–810 (2007)	10.1007/978-3-319-23497-7_11	2015	https://link.springer.com/chapter/10.1007/978-3-319-23497-7_11	PRISMA
Big Data, Evolution, and Metagenomes: Predicting Disease from Gut Microbiota Codon Usage Profiles.	Fabijanić Maja, Vlahoviček Kristian	random Forest	shotgun metagenomics	Liver Cirrhosis	Liver Cirrhosis;	Classification	Nature 2014; 513(7516):59–64	10.1007/978-1-4939-3572-7_26	2016-08-01	https://www.ncbi.nlm.nih.gov/pubmed/27115650	PRISMA
Sparse distance-based learning for simultaneous multiclass classification and feature selection of metagenomic data.	Liu Zhenqiu, Hsiao William, Cantarel Brandi L, Drábek Elliott Franco, Fraser-Liggett Claire	multi-label classification, feature selection	16s rRNA and shotgun metagenomic	-	Body Composition	Develop method	Science. 326, 1694–1697	10.1093/bioinformatics/btr547	2011-12-01	https://www.ncbi.nlm.nih.gov/pubmed/21984758	PRISMA
The Skin Microbiome of Cohabiting Couples.	Ross Ashley A, Doxey Andrew C, Neufeld Josh D	Random Forest	16s rRNA		Body Composition	Study skin microbiome	own data	10.1128/mSystems.00043-17	2017/07/20	https://www.ncbi.nlm.nih.gov/pubmed/28761935	PRISMA
Machine learning classifiers provide insight into the relationship between microbial communities and bacterial vaginosis	Daniel Beck,James A. Foster	regression	16s rRNA	Liver Cirrhosis; Colorectal Neoplasms; Inflammatory Bowel Diseases;	Vaginosis, Bacterial	Study bacterial vaginosis	Proc Natl Acad Sci. 2011;108(Supplement 1):4680–687; Am J Med. 1983;74(1):14–22	10.1186/s13040-015-0055-3	2015	https://link.springer.com/article/10.1186/s13040-015-0055-3	PRISMA
Application of a hierarchical enzyme classification method reveals the role of gut microbiome in human metabolism.	Mohammed Akram, Guda Chittibabu	hierarchical multi-label classification	proteomic	Inflammatory Bowel Disease, obesity	Inflammatory Bowel Diseases; Obesity	Predict enzymes	Nature 2010, 464(7285):59–65; SIGKDD Explor 2009, 11:10-18.;	10.1186/1471-2164-16-S7-S16	2015/06/11	https://www.ncbi.nlm.nih.gov/pubmed/26099921	PRISMA
MicroPheno: predicting environments and host phenotypes from 16S rRNA gene sequencing using a k-mer based representation of shallow sub-samples.	Asgari Ehsaneddin, Garakani Kiavash, McHardy Alice C, Mofrad Mohammad R K	RF, SVM, Deep Learning	16s rRNA, OTU tables	Chron's Disease	Body Composition; Inflammatory Bowel Diseases	Develop method	Cell Host Microbe, 15, 382–392 (2014)	10.1093/bioinformatics/bty296	2019/8/28	https://www.ncbi.nlm.nih.gov/pubmed/29950008	PRISMA
Phylogenetic approaches to microbial community classification.	Ning Jie, Beiko Robert G	dimensionality reduction,feature selection,supervised learning, SVM	OTU tables		Oral Cavity	Study oral plaque	Human Microbiome Project	10.1186/s40168-015-0114-5	2015/10/05	https://www.ncbi.nlm.nih.gov/pubmed/26437943	PRISMA
Association of Flavonifractor plautii, a Flavonoid-Degrading Bacterium, with the Gut Microbiome of Colorectal Cancer Patients in India.	Gupta Ankit, Dhakan Darshan B, Maji Abhijit, Saxena Rituja, P K Vishnu Prasoodanan, Mahajan Shruti, Pulikkan Joby, Kurian Jacob, Gomez Andres M, Scaria Joy, Amato Katherine R, Sharma Ashok K, Sharma Vineet K	Random Forest	Shotgun metagenomics data (mOTU, MGS, Methaphlan species), Gene Counts.	Colorectal Cancer	Colorectal Neoplasms	Relation between species & CRC	own data	10.1128/mSystems.00438-19	2019/11/12	https://www.ncbi.nlm.nih.gov/pubmed/31719139	PRISMA
Cutibacterium acnes (Propionibacterium acnes) 16S rRNA Genotyping of Microbial Samples from Possessions Contributes to Owner Identification.	Yang Jiayue, Tsukimi Tomoya, Yoshikawa Mia, Suzuki Kenta, Takeda Tomoki, Tomita Masaru, Fukuda Shinji	Random Forest	16s rRNA, OTU tables and shotgun metagenomic		Skin	Skin individual signatures	own data	10.1128/mSystems.00594-19	2019/11/26	https://www.ncbi.nlm.nih.gov/pubmed/31771975	PRISMA
Robust biomarker discovery for microbiome-wide association studies.	Zhu Qiang, Li Bojing, He Tingting, Li Guangrong, Jiang Xingpeng	dimensionality reduction,feature selection	shotgun metagenomics		Liver Cirrhosis; Obesity; Diabetes Mellitus, Type 2	feature selection method	Nature 2014;513(7516):59–64 ;Nature 2013;500(7464):541–546; Nature 2012;490(7418):55–60; Nature 2013;498(7452):99–103	10.1016/j.ymeth.2019.06.012	2019/06/22	https://www.ncbi.nlm.nih.gov/pubmed/31238097	PRISMA
Looking for a Signal in the Noise: Revisiting Obesity and the Microbiome.	Sze Marc A, Schloss Patrick D	Random Forest	16s rRNA, OTU tables	Obesity	Obesity	predict obesity status on the basis of the composition of an individual’s microbiome	Genome Med 8:37 (2016); BMC Microbiol 14:311 (2014); Cell 159: 789–799 (2015); Microbiome 3:7 (2015); Nature 486:207–214 (2012); mBio 5:e01021-14 (2014); Nature 444:1027–1031 (2006); Science 334: 105–108 (2011); Cell 163:1079–1094 (2015); PLoS One 7:e43052 (2012)	10.1128/mBio.01018-16	2016/08/23	https://www.ncbi.nlm.nih.gov/pubmed/27555308	PRISMA
A comprehensive evaluation of multicategory classification methods for microbiomic data.	Statnikov Alexander, Henaff Mikael, Narendra Varun, Konganti Kranti, Li Zhiguo, Yang Liying, Pei Zhiheng, Blaser Martin J, Aliferis Constantin F, Alekseyenko Alexander V	feature selection, random forest, support vector machines, kernel ridge regression, Bayesian logistic regression, k-nearest neighbors, probabilistic neural networks.	OTU tables		Body Composition; Skin; Psoriasis; Barrett Esophagus; Esophagitis; Adenocarcinoma Of Esophagus	comparison of ML methods, multicategory classification	Science 2009, 326:1694–1697; Proc Natl Acad Sci USA 2010, 107:6477–6481; ;Nature Precedings 2010	10.1186/2049-2618-1-11	2013/04/05	https://www.ncbi.nlm.nih.gov/pubmed/24456583	PRISMA
Leveraging Human Microbiome Features to Diagnose and Stratify Children with Irritable Bowel Syndrome.	Hollister Emily B, Oezguen Numan, Chumpitazi Bruno P, Luna Ruth Ann, Weidler Erica M, Rubio-Gonzales Michelle, Dahdouli Mahmoud, Cope Julia L, Mistretta Toni-Ann, Raza Sabeen, Metcalf Ginger A, Muzny Donna M, Gibbs Richard A, Petrosino Joseph F, Heitkemper Margaret, Savidge Tor C, Shulman Robert J, Versalovic James	RF, LASSO featureselection, SVM, naïve Bayes	Shotgun metagenomics, Metabolomics, Gene Count	Pediatric Irritable Bowel Syndrome (IBS)	Inflammatory Bowel Diseases	The identification of microbial and metabolic features that distinguish IBS cases from controls may improve IBS diagnosis	own data	10.1016/j.jmoldx.2019.01.006	2019/04/17	https://www.ncbi.nlm.nih.gov/pubmed/31005411	PRISMA
Novel taxonomy-independent deep learning microbiome approach allows for accurate classification of different forensically relevant human epithelial materials.	Díez López Celia, Vidaki Athina, Ralf Arwin, Montiel González Diego, Radjabzadeh Djawad, Kraaij Robert, Uitterlinden André G, Haas Cordula, Lao Oscar, Kayser Manfred	Deep learning	16s rRNA		Body Composition		Human Microbiome Project	10.1016/j.fsigen.2019.03.015	2019/04/04	https://www.ncbi.nlm.nih.gov/pubmed/31003081	PRISMA
A Dirichlet-Multinomial Bayes Classifier for Disease Diagnosis with Microbial Compositions.	Gao Xiang, Lin Huaiying, Dong Qunfeng	dimensionality reduction,feature selection	OTU tables		Inflammatory Bowel Diseases; Non-alcoholic Fatty Liver Disease	Develop Dirichlet-multinomial Bayes classifier	own data	10.1128/mSphereDirect.00536-17	2017/12/13	https://www.ncbi.nlm.nih.gov/pubmed/29242838	PRISMA
Metabolome of human gut microbiome is predictive of host dysbiosis.	Larsen Peter E, Dai Yang	SVM	16s rRNA		Dysbiosis	prediction of host dysbiosis individual cases	Genome Biol. 2014;15(7):R89	10.1186/s13742-015-0084-3	2015/09/14	https://www.ncbi.nlm.nih.gov/pubmed/26380076	PRISMA
Gene prediction in metagenomic fragments based on the SVM algorithm.	Liu Yongchu, Guo Jiangtao, Hu Gangqing, Zhu Huaiqiu	SVM	Shotgun metagenomics			method for identifying genes in metagenomic fragments	Science 2006, 312(5778):1355-1359; Science 2005,308(5721):554-557	10.1186/1471-2105-14-S5-S12	2013/04/10	https://www.ncbi.nlm.nih.gov/pubmed/23735199	PRISMA
BMCMDA: a novel model for predicting human microbe-disease associations via binary matrix completion.	Shi Jian-Yu, Huang Hua, Zhang Yan-Ning, Cao Jiang-Bo, Yiu Siu-Ming	regression	16s rRNA		Allergy and Immunology; Asthma; Dermatitis, Atopic; Vaginosis, Bacterial; Clostridium difficile; Colorectal Neoplasms; Inflammatory Bowel Diseases; Pulmonary Disease, Chronic Obstructive; Cystic Fibrosis; Eczema; Psoriasis; Kidney Calculi; Liver Cirrhosis; Obesity; Arthritis, Rheumatoid; Diabetes Mellitus, Type 2;Diabetes Mellitus, Type 1; Whipple Disease	novel model for predicting human microbe-disease associations	Bioinformatics. 2017;33(5):733–9	10.1186/s12859-018-2274-3	2018/08/13	https://www.ncbi.nlm.nih.gov/pubmed/30367598	PRISMA
Gene expression profiling gut microbiota in different races of humans.	Chen Lei, Zhang Yu-Hang, Huang Tao, Cai Yu-Dong	dimensionality reduction,feature construction,feature selection	RNA-seq			Race diversity using RNA-seq from microbiota	http://meta.genomics.cn/metagene/meta/dataTools	10.1038/srep23075	2016/03/15	https://www.ncbi.nlm.nih.gov/pubmed/26975620	PRISMA
Machine learning performance in a microbial molecular autopsy context: A cross-sectional postmortem human population study.	Zhang Yu, Pechal Jennifer L, Schmidt Carl J, Jordan Heather R, Wang Wesley W, Benbow M Eric, Sze Sing-Hoi, Tarone Aaron M	boosted algorithms, random forests, and neural networks	16S rRNA		Postmortem Changes	abilities to predict case attributes: postmortem interval (PMI), location of death, and manner of death.	Scientific Reports. 2018; 8:5724; 16S data	10.1371/journal.pone.0213829	2019/04/15	https://www.ncbi.nlm.nih.gov/pubmed/30986212	PRISMA
Machine learning techniques accurately classify microbial communities by bacterial vaginosis characteristics.	Beck Daniel, Foster James A	regression, RF, genetic programming	16s rRNA		Vaginosis, Bacterial	Classification different vaginosis	Proceedings of the National Academy of Science USA 108: 4680–4687 (2011); PLoS One 7: 6 (2012)	10.1371/journal.pone.0087830	2014/02/03	https://www.ncbi.nlm.nih.gov/pubmed/24498380	PRISMA
MUSiCC: a marker genes based framework for metagenomic normalization and accurate profiling of gene abundances in the microbiome.	Manor Ohad, Borenstein Elhanan		Shotgun metagenomics		Body Composition; Inflammatory Bowel Diseases; Diabetes Mellitus, Type 2	a marker genes based framework for metagenomic normalization and accurate profiling of gene abundances	Human Microbiome Project; Nature. 2010;464:59–65; Nature. 2012;490:55–60	10.1186/s13059-015-0610-8	2015/03/25	https://www.ncbi.nlm.nih.gov/pubmed/25885687	PRISMA
MITRE: inferring features from microbiota time-series data linked to host status.	Bogart Elijah, Creswell Richard, Gerber Georg K	feature engineering,supervised learning,time-series analysis	16s rRNA, OTU tables		Body Composition; Diet; Diabetes Mellitus, Type 1; Infant, Premature; Pregnant Women	method for microbiome time-series analysis	Cell. 2016;165:842–53; Nature. 2014;505:559–6; Sci Transl Med. 2016;8:343ra382; Cell Host Microbe. 2015;17:260–73; Proc Natl Acad Sci U S A. 2015;112:11060–5.	10.1186/s13059-019-1788-y	2019/09/02	https://www.ncbi.nlm.nih.gov/pubmed/31477162	PRISMA
Microbiome Learning Repo (ML Repo): A public repository of microbiome regression and classification tasks.	Vangay Pajau, Hillmann Benjamin M, Knights Dan	regression	16s rRNA, OTU tables, shotgun metagenomics		Age Distribution; Diet; Inflammatory Bowel Diseases; Body Composition; Colorectal Neoplasms; Bacteremia; Obesity; Vaginosis, Bacterial; Diabetes Mellitus, Type 2; Liver Cirrhosis	Workflow with 33 ML methods	Many repeated	10.1093/gigascience/giz042	2019/03/26	https://www.ncbi.nlm.nih.gov/pubmed/31042284	PRISMA
A Review and Tutorial of Machine Learning Methods for Microbiome Host Trait Prediction	Yi-Hui Zhou and Paul Gallins	regression, linear discriminant analysis, SVM, simimlarity matrices and related kernel methods, KNN, random forest, gradient boosting for decision trees, and neural networks.	16s rRNA, OTU tables		Liver Cirrhosis; Colorectal Neoplasms; Inflammatory Bowel Diseases; Obesity; Diabetes Mellitus, Type 2; Postmortem Changes; Gender Identity; Body Composition; Mouth	comparison of ML methods	Many repeated	10.3389/fgene.2019.00579	2019-06-25	https://www.ncbi.nlm.nih.gov/pubmed/31293616	PRISMA
Metagenomic and metabolomic analyses reveal distinct stage-specific phenotypes of the gut microbiota in colorectal cancer.	Yachida, Shinichi, Sayaka Mizutani, Hirotsugu Shiroma, Satoshi Shiba, Takeshi Nakajima, Taku Sakamoto, Hikaru Watanabe, et al.	Supervised Learning Methods. Regression	Shotgun metagenomics: Gene/pathway count table, and MGS.	CRC	Colorectal Neoplasms	different phenotypes in CRC	own data	https://doi.org/10.1038/s41591-019-0458-7	2019	https://www.nature.com/articles/s41591-019-0458-7	Manually added (Aplications)
Meta-Analysis of Fecal Metagenomes Reveals Global Microbial Signatures That Are Specific for Colorectal Cancer.	Wirbel, Jakob, Paul Theodor Pyl, Ece Kartal, Konrad Zych, Alireza Kashani, Alessio Milanese, Jonas S. Fleck, et al.	Supervised Learning Methods. Regression	Shotgun metagenomics: Gene/pathway count table, and MGS.	CRC	Colorectal Neoplasms	microbial signatures in CRC	own data	https://doi.org/10.1038/s41591-019-0406-6	2019	https://www.nature.com/articles/s41591-019-0406-6	Manually added (Aplications)
The oral microbiota in colorectal cancer is distinctive and predictive.	Flemer, B., R. D. Warren, M. P. Barrett, K. Cisek, A. Das, I. B. Jeffery, E. Hurley, M. O’Riordain, F. Shanahan, and P. W. O’Toole.	Supervised Learning Methods. Regression	16s rRNA, OTU tables	CRC	Colorectal Neoplasms	microbial signatures in CRC	own data	https://doi.org/10.1136/gutjnl-2017-314814.	2017	https://gut.bmj.com/content/67/8/1454	Manually added (Aplications)
Metagenomic analysis of colorectal cancer datasets identifies cross-cohort microbial diagnostic signatures and a link with choline degradation.	Andrew Maltez Thomas , Paolo Manghi, Francesco Asnicar, Edoardo Pasolli, Federica Armanini, Moreno Zolfo, Francesco Beghini, Serena Manara, Nicolai Karcher, Chiara Pozzi, Sara Gandini, Davide Serrano, Sonia Tarallo, Antonio Francavilla, Gaetano Gallo, Mario Trompetto, Giulio Ferrero, Sayaka Mizutani, Hirotsugu Shiroma, Satoshi Shiba, Tatsuhiro Shibata , Shinichi Yachida, Takuji Yamada, Jakob Wirb…	Supervised Learning Methods. Regression	Shotgun metagenomics: Gene/pathway count table, and MGS.	CRC	Colorectal Neoplasms	microbial signatures in CRC	own data	10.1038/s41591-019-0405-7.	2019	https://www.nature.com/articles/s41591-019-0405-7	Manually added (Aplications)
Gut Microbiota Has a Widespread and Modifiable Effect on Host Gene Regulation	Allison L. Richards, Amanda L. Muehlbauer, Adnan Alazizi, Michael B. Burns, Anthony Findley, Francesco Messina, Trevor J. Gould, Camilla Cascardo, Roger Pique-Regi, Ran Blekhman, Francesca Luca	Unsuprvised methods	16s rRNA		Host Microbial Interactions	trascriptomic changes after microbial extracts	own data	https://doi.org/10.1128/mSystems.00323-18	2018	https://msystems.asm.org/content/4/5/e00323-18	Manually added (Aplications)
Comparing clustering and pre-processing in taxonomy analysis	Abeln, M. B. S., Zaura, E., and Brandt, B.	Clustering	16s rRNA			comparing clustering & pre-processing methods		https://doi.org/10.1093/bioinformatics/bts552	2012	https://academic.oup.com/bioinformatics/article/28/22/2891/241231	Manually added (Aplications)
ESPRIT-Tree: hierarchical clustering analysis of millions of 16S rRNA pyrosequences in quasilinear computational time	Yunpeng Cai and Yijun Sun	Hierarchical clustering	16s rRNA		Obesity	New cluster algorithm	Nature., 457, 480–485 (2009)	https://doi.org/10.1093/nar/gkr349	2011	https://academic.oup.com/nar/article/39/14/e95/1390815	Manually added (Aplications)
DeepARG: a deep learning approach for predicting antibiotic resistance genes from metagenomic data	Gustavo Arango-Argoty, Emily Garner, Amy Pruden, Lenwood S. Heath, Peter Vikesland & Liqing Zhang	Supervised ML, Deep Learning, Classification	Shotgun metagenomics		Drug Resistance, Microbial	Method Predict Ab resistance genes	CARD [27], ARDB [28], and UNIPROT [26].	https://doi.org/10.1186/s40168-018-0401-z	2018	https://microbiomejournal.biomedcentral.com/articles/10.1186/s40168-018-0401-z	Manually added (Aplications)
Large-scale machine learning for metagenomics sequence classification	Kévin Vervier,Pierre Mahé, Maud Tournoud,Jean-Baptiste Veyrieras, and Jean-Philippe Vert	Supervised ML, Classification	Shotgun metagenomics			New method taxonomic assigment	5201 complete bacterial and archeal genomes available in the NCBI RefSeq database as of July 2014	https://doi.org/10.1093/bioinformatics/btv683	2016	https://academic.oup.com/bioinformatics/article/32/7/1023/1743748	Manually added (Aplications)
Impact of training sets on classification of high-throughput bacterial 16s rRNA gene surveys.	Jeffrey J Werner, Omry Koren, Philip Hugenholtz, Todd Z DeSantis, William A Walters, J Gregory Caporaso, Largus T Angenent, Rob Knight & Ruth E Ley	Classification	16s rRNA		Body Composition;	Compare taxonomic classification	Science 326: 1694–1697 (2009)	10.1038/ismej.2011.82	2012	https://www.nature.com/articles/ismej201182	Manually added (Aplications)
MetaMarker: a pipeline for de novo discovery of novel metagenomic biomarkers	Koohi-Moghadam, M., Borad, M. J., Tran, N. L., Swanson, K. R., Boardman, L. A., Sun, H., & Wang, J.	Classification	Shotgun metagenomics		Colorectal Neoplasms	pipeline for discovering metagenomic biomarkers	Molecular systems biology 2014;10(11):766	10.1093/bioinformatics/btz123	2019	https://academic.oup.com/bioinformatics/article-abstract/35/19/3812/5368527?redirectedFrom=fulltext	Manually added (Aplications)
Two dynamic regimes in the human gut microbiome	Gibbons, Sean M.; Kearney, Sean M.; Smillie, Chris S.; Alm, Eric J.	sparse vector autoregressive model	16s rRNA		Dysbiosis; Diet	Time series changes with diet	Genome Biol. 2014; 15(7):R8; Genome Biol. 2011; 12(5):R50	10.1371/journal.pcbi.1005364	2017	https://dx.plos.org/10.1371/journal.pcbi.1005364	Piotr (Github)
Metagenomics meets time series analysis: unraveling microbial community dynamics	Faust, Karoline; Lahti, Leo; Gonze, Didier; de Vos, Willem M; Raes, Jeroen	Network inference, Time-series analysis	16s rRNA		Diet; Vaginosis, Bacterial	time series analysis techniques comparison	Genome Biol. 2014; 15(7):R8; Sci Transl Med 2012, 4:132ra152	10.1016/j.mib.2015.04.004	2015	https://linkinghub.elsevier.com/retrieve/pii/S1369527415000478	Piotr (Github)
An adaptive association test for microbiome data	Wu, Chong; Chen, Jun; Kim, Junghi; Pan, Wei	novel multivariate testing method called aMiSPU	16s rRNA		Diet; Inflammatory Bowel Diseases; Smoking	Method for associations	Science. 2011;334(6052):105–18; Gastroenterology. 2010;139(6):1844–54; PLoS ONE. 2010;5(12):15216.	10.1186/s13073-016-0302-3	2016	http://genomemedicine.biomedcentral.com/articles/10.1186/s13073-016-0302-3	Piotr (Github)
Universality of human microbial dynamics	Bashan, Amir; Gibson, Travis E.; Friedman, Jonathan; Carey, Vincent J.; Weiss, Scott T.; Hohmann, Elizabeth L.; Liu, Yang-Yu	Time series models	16s rRNA		Body Composition; Diet;	Method for Microbiome Dynamics	the Human Microbial Project (HMP)9,15 and the Student Microbiome Project (SMP)16; Genome Biol. 2014; 15(7):R8; Genome Biol. 2011; 12(5):R50	10.1038/nature18301	2016	http://www.nature.com/articles/nature18301	Piotr (Github)
Dirichlet Multinomial Mixtures: Generative Models for Microbial Metagenomics	Holmes, Ian; Harris, Keith; Quince, Christopher	Dirichlet Multinomial Mixture	OTU tables		Obesity; Inflammatory Bowel Diseases;	Method for probabilistic modelling	Nature., 457, 480–485 (2009); Gastroenterology. 2010;139(6):1844–54	10.1371/journal.pone.0030126	2012	https://dx.plos.org/10.1371/journal.pone.0030126	Piotr (Github)
Longitudinal Prediction of the Infant Gut Microbiome with Dynamic Bayesian Networks	McGeachie, Michael J.; Sordillo, Joanne E.; Gibson, Travis; Weinstock, George M.; Liu, Yang-Yu; Gold, Diane R.; Weiss, Scott T.; Litonjua, Augusto	Dynamic Bayesian Networks	16S rRNA	future changes in microbiome composition	Infant, Premature;	Dynamic Bayesian Networks were able to identify important relationships between microbiome taxa and predict future changes in microbiome composition	Proc. Natl. Acad. Sci. USA. 111, 12522–12527 (2014).	10.1038/srep20359	2016	http://www.nature.com/articles/srep20359	Piotr (Github)
Microbial Co-occurrence Relationships in the Human Microbiome	Faust, Karoline; Sathirapongsasuti, J. Fah; Izard, Jacques; Segata, Nicola; Gevers, Dirk; Raes, Jeroen; Huttenhower, Curtis	Generalized Boosted Linear Models	16S rRNA	general human microbiome	Body Composition	intra-body site and inter-body site relationships as a single integrated microbial co-occurrence network	human gut microbiome	10.1371/journal.pcbi.1002606	2012	https://dx.plos.org/10.1371/journal.pcbi.1002606	Piotr (Github)
Host lifestyle affects human microbiota on daily timescales	David, Lawrence A; Materna, Arne C; Friedman, Jonathan; Campos-Baptista, Maria I; Blackburn, Matthew C; Perrotta, Allison; Erdman, Susan E; Alm, Eric J	Time series models, Autoregressive integrated moving average models, logistic regression models	16S rRNA		Diet	changes in host fiber intake positively correlated with next-day abundance changes among 15% of gut microbiota members.	own data (Genome Biol. 2014; 15(7):R8)	10.1186/gb-2014-15-7-r89	2014	http://genomebiology.biomedcentral.com/articles/10.1186/gb-2014-15-7-r89	Piotr (Github)
‘TIME’: A Web Application for Obtaining Insights into Microbial Ecology Using Longitudinal Microbiome Data	Baksi, Krishanu D.; Kuntal, Bhusan K.; Mande, Sharmila S.	Time series models	16s rRNA		Diet; Drug Resistance, Microbial; Vaginosis, Bacterial	Web application longitudinal data	Genome Biol. 2011; 12(5):R50; Proc. Natl. Acad. Sci. U.S.A. 108(Suppl. 1), 4554–4561 (2011); Sci Transl Med. 2012;4(132):132–52	10.3389/fmicb.2018.00036	2018	http://journal.frontiersin.org/article/10.3389/fmicb.2018.00036/full	Piotr (Github)
A Distance-Based Kernel Association Test Based on the Generalized Linear Mixed Model for Correlated Microbiome Studies	Koh, Hyunwook; Li, Yutong; Zhan, Xiang; Chen, Jun; Zhao, Ni	Linear mixed model	OTU tables		Obsesity;	Method for longitudinal data	Cell 159, 798–799 (2014);	10.3389/fgene.2019.00458	2019	https://www.frontiersin.org/article/10.3389/fgene.2019.00458/full	Piotr (Github)
Methanobrevibacter attenuation via probiotic intervention reduces flatulence in adult human: A non-randomised paired-design clinical trial of efficacy	Seo, Minseok; Heo, Jaeyoung; Yoon, Joon; Kim, Se-Young; Kang, Yoon-Mo; Yu, Jihyun; Cho, Seoae; Kim, Heebal	Correlation-based network analysis. Dimensionality reduction.	16s rRNA, OTU tables	Gastrointestinal symptoms in healthy humans	Flatulence	clinical trial: Methanobrevibacter attenuation via probiotic intervention reduces flatulence in adult human	own dataset	10.1371/journal.pone.0184547	2017	https://dx.plos.org/10.1371/journal.pone.0184547	Piotr (Github)
Associations between the human intestinal microbiota, <i>Lactobacillus rhamnosus</i> GG and serum lipids indicated by integrated analysis of high-throughput profiling data	Lahti, Leo; Salonen, Anne; Kekkonen, Riina A.; Salojärvi, Jarkko; Jalanka-Tuovinen, Jonna; Palva, Airi; Orešič, Matej; de Vos, Willem M.	Linear models, unsupervised hierarchical clustering	16S rRNA	serum lipid	Probiotics	association between the gut microbiome and lipid profile	own dataset	10.7717/peerj.32	2013	https://peerj.com/articles/32	Piotr (Github)
The human gut microbiome in early-onset type 1 diabetes from the TEDDY study	Vatanen, Tommi; Franzosa, Eric A.; Schwager, Randall; Tripathi, Surya; Arthur, Timothy D.; Vehik, Kendra; Lernmark, Åke; Hagopian, William A.; Rewers, Marian J.; She, Jin-Xiong; Toppari, Jorma; Ziegler, Anette-G.; Akolkar, Beena; Krischer, Jeffrey P.; Stewart, Christopher J.; Ajami, Nadim J.; Petrosino, Joseph F.; Gevers, Dirk; Lähdesmäki, Harri; Vlamakis, Hera; Huttenhower, Curtis; Xavier, Ramni…	dimensionality reduction, supervised learning methods, Linear mixed effect modelling	16S rRNA	Type I diabetes	Diabetes Mellitus, Type 1	study human gut microbiome in relation to islet autoimmunity	own dataset	10.1038/s41586-018-0620-2	2018	http://www.nature.com/articles/s41586-018-0620-2	Piotr (Github)
Machine Learning Leveraging Genomes from Metagenomes Identifies Influential Antibiotic Resistance Genes in the Infant Gut Microbiome	Rahman, Sumayah F.; Olm, Matthew R.; Morowitz, Michael J.; Banfield, Jillian F.	Random Forest, boosted decision trees, dimensionality reduction	shotgun metagenomics		Drug Resistance, Microbial; Infant, Premature	Identifies Influential Antibiotic Resistance Genes in the Infant Gut Microbiome	own dataset	10.1128/mSystems.00123-17	2018	https://msystems.asm.org/lookup/doi/10.1128/mSystems.00123-17	Piotr (Github)
Composition of gut microbiota and its association with body mass index and lifestyle factors in a cohort of 7-18 years old children from the American Gut Project: Gut microbiota and BMI in children	Bai, J.; Hu, Y.; Bruner, D. W.	linear decomposition model.	16S rRNA	BMI	Obesity; Diet	Composition of gut microbiota and its associations with BMI level, weight change and lifestyles	American gut project	10.1111/ijpo.12480	2019	http://doi.wiley.com/10.1111/ijpo.12480	Piotr (Github)
MixMC: A Multivariate Statistical Framework to Gain Insight into Microbial Communities	Lê Cao, Kim-Anh; Costello, Mary-Ellen; Lakis, Vanessa Anne; Bartolo, François; Chua, Xin-Yi; Brazeilles, Rémi; Rondeau, Pascale		16S rRNA		Body Composition; Atherosclerosis	a novel multivariate data analysis framework for metagenomic biomarker discovery	the Human Microbial Project (HMP); Proceedings of the National Academy of Sciences 108 (Supplement 1), 4592–4598 (2011)	10.1371/journal.pone.0160169	2016	https://dx.plos.org/10.1371/journal.pone.0160169	Piotr (Github)
MDPbiome: microbiome engineering through prescriptive perturbations	García-Jiménez, Beatriz; de la Rosa, Tomás; Wilkinson, Mark D	Markov Decision Process	OTU tables		Vaginosis, Bacterial; Infant, Premature	Method Microbiome dynamics & perturbations in microbiome time series	Sci Transl Med. 2012;4(132):132–52; Proc Natl Acad Sci. 2014;111(34):12522–7.	10.1093/bioinformatics/bty562	2018	https://academic.oup.com/bioinformatics/article/34/17/i838/5093255	Piotr (Github)
Gut Microbiome Composition Is Associated with a Pathologic Response After Preoperative Chemoradiation in Patients with Rectal Cancer	Bum-Sup Jang, Ji Hyun Chang, Eui Kyu Chie, Kyubo Kim, Ji Won Park, Min Jung Kim, Eun-Ji Song, Young-Do Nam, Seung Wan Kang, Seung-Yong Jeong, Hak Jae Kim	Bayesian Networks	16S rRNA	Rectal cancer	Rectal cancer; therapeutic response; microbial networks	Bayesian network analysis reveals a link between a specific taxon and an improved therapeutic response	own dataset	10.1016/j.ijrobp.2020.04.015	2020	https://www.sciencedirect.com/science/article/pii/S0360301620310336?dgcid=rss_sd_all	Manually added
Data mining analysis of human gut microbiota links Fusobacterium spp. with colorectal cancer onset	Najla Kharrat, Mourad Assidi, Muhammad Abu-Elmagd, Peter N Pushparaj, Areej Alkhaldy, Leila Arfaoui, Muhammad Imran Naseer, Abdelfatteh El Omri, Safia Messaoudi, Abdelbaset Buhmeida, Ahmed Rebai	Bayesian Networks and IDA method	16s rRNA, OTU tables	CRC	Microbial markers; CRC progression	Evidence of crucial role of specific gut microbial species and their metabolites in CRC risk and onset	Data from two independent studies: Marchesi JR et al. PLoS One 2011, 6:e20447; Zeller G et al. Mol Syst Biol. 2014, 10:766	10.6026/97320630015372	2019	https://www.ncbi.nlm.nih.gov/pmc/articles/PMC6614120/	Manually added
Genome-wide associations of human gut microbiome variation and implications for causal inference analyses	David A. Hughes, Rodrigo Bacigalupe, Jun Wang, Malte C. Rühlemann, Raul Y. Tito, Gwen Falony, Marie Joossens, Sara Vieira-Silva, Liesbet Henckaerts, Leen Rymenans, Chloë Verspecht, Susan Ring, Andre Franke, Kaitlin H. Wade, Nicholas J. Timpson, Jeroen Raes	Mendelian randomization	16S rRNA	Eleven metabolic health, inflammatory and neurological traits	Microbial traits and disease	Associations between microbial traits and disease	Flemish Gut Flora Project and two German cohorts (FoCus and PopGen)	10.1038/s41564-020-0743-8	2020	https://www.nature.com/articles/s41564-020-0743-8	Manually added
Causal relationships among the gut microbiome, short-chain fatty acids and metabolic diseases	Serena Sanna, Natalie R van Zuydam, Anubha Mahajan, Alexander Kurilshikov, Arnau Vich Vila, Urmo Võsa, Zlatan Mujagic, Ad A M Masclee, Daisy M A E Jonkers, Marije Oosting, Leo A B Joosten, Mihai G Netea, Lude Franke, Alexandra Zhernakova, Jingyuan Fu. Cisca Wijmenga, Mark I McCarthy	Mendelian randomization	shotgun metagenomics	Metabolic; type 2 diabetes	Metabolic traits; type 2 diabetes; fecal short-chain fatty acid (SCFA)	Causal role of gut-produced fecal SCFA with respect to energy balance and glucose homeostasis	LifeLines-DEEP metagenomic sequencing data at European Genome-phenome Archive (EGA); Lifelines Biobank; GIANT, MAGIC and DIAGRAM	10.1038/s41588-019-0350-x	2019	https://www.nature.com/articles/s41588-019-0350-x?proof=true	Manually added
Usefulness of Machine Learning-Based Gut Microbiome Analysis for Identifying Patients with Irritable Bowels Syndrome	Fukui, H.; Nishida, A.; Matsuda, S.; Kira, F.; Watanabe, S.; Kuriyama, M.; Kawakami, K.; Aikawa, Y.; Oda, N.; Arai, K.; Matsunaga, A.; Nonaka, M.; Nakai, K.; Shinmura, W.; Matsumoto, M.; Morishita, S.; Takeda, A.K.; Miwa, H.	LASSO logistic regression for feature selection (IBS severity) + random forest for classification (patients/controls)	16S rRNA	Irritable bowel syndrome				10.3390/jcm9082403	2020	https://www.mdpi.com/2077-0383/9/8/2403	Manually added
Identification of an Intestinal Microbiota Signature Associated With Severity of Irritable Bowel Syndrome	Tap, J., Derrien, M., Törnblom, H., Brazeilles, R., Cools-Portier, S., Doré, J., ... & Simrén, M. (2017). Identification of an intestinal microbiota signature associated with severity of irritable bowel syndrome. Gastroenterology, 152(1), 111-123.	LASSO logistic regression for IBS severity	16S rRNA	Irritable Bowel Syndrome	Irritable Bowel Syndrome	Signatures of IBS	own dataset	10.1053/j.gastro.2016.09.049	2017	https://www.sciencedirect.com/science/article/pii/S0016508516351745	Manually added
A Metagenomic Hybrid Classifier for Paediatric Inflammatory Bowel Disease	Wingfield B., Coleman S., McGinnity T.M., Bjourson A.	SVM, MultiLayer Perceptron	16S rRNA	IBD; Paediatric	Patient diagnosis, Human intestinal microbiome	Supervised learning from taxonomic and functional profiles	E. Papa et al., “Non-invasive mapping of the gastrointestinal microbiota identifies children with inflammatory bowel disease,” PloS one, vol. 7, no. 6, p. e39242, 2012.	10.1109/IJCNN.2016.7727318	2016	https://ieeexplore.ieee.org/document/7727318/keywords#keywords	Manually added
Phylogenetic convolutional neural networks in metagenomics	Fioraventi D., Giarratano Y., Maggio V., Agostinelli C., Chierici M., Jurman G., Furlanello C.	Convolutional Neural Network	16S rRNA	IBD	IBD subtype, flare, remission	Method for easier and reliable diagnostic of IBD	Sokol H. et al. Fungal microbiota dysbiosis in IBD. Gut. 2017;66(6):1039–48.	10.1186/s12859-018-2033-5	2017	https://bmcbioinformatics.biomedcentral.com/articles/10.1186/s12859-018-2033-5	Manually added
Using Decision Tree Aggregation with Random Forest Model to Identify Gut Microbes Associated with Colorectal Cancer	Dongmei A., Hongfei P., Rongbao H., Xiaoxin L., Gang L., Li C. Xia	Random Forest	shotgun metagenomics	CRC	Colorectal neoplasms, dysbiosis, Porphyromonas, gastrointestinal microbiome, fusobacterium	Relation between microbes and CRC	Zeller, G. et al. Potential of fecal microbiota for early-stage detection of colorectal cancer. Mol. Syst. Biol. 2014, 10, 766.	10.3390/genes10020112	2019	https://pubmed.ncbi.nlm.nih.gov/30717284/	Manually added
Machine Learning Analysis of Inflammatory Bowel Disease-Associated Metagenomics Dataset	Hacilar H., Burcu B. G., Ufuk Nalbantoglu	Supervised Learning method comparison	shotgun metagenomics	IBD	Ulcerative colitis, Crohn's disease, gut related disorders	Comparison of ml techniques to classify metagenomic data	Qin J, Li R, Raes J, et al. A human gut microbial gene catalogue established by metagenomic sequencing. Nature. 2010;464(7285):59-65. doi:10.1038/nature08821	10.1109/UBMK.2018.8566487	2018	https://ieeexplore.ieee.org/abstract/document/8566487	Manually added
Interpretation of microbiota-based diagnostics by explaining individual classifier decisions	A. Eck, L. M. Zintgraf, E. F. J. de Groot, T. G. J. de Meij, T. S. Cohen, P. H. M. Savelkoul, M. Welling and A. E. Budding	Supervised learing algorithms: Linear Support Vector Machine (SVM), Random Forest (RF), Nearest Shrunken Centroids (NSC) and Logistic Regression with L2 regularization (LR).	16S–23S rRNA	skin vs gut classification, IBD	IBD	Two classifications were studied: 1. gut versus skin microbiota samples, and 2. inflammatory bowel disease versus healthy gut microbiota samples to show that ML can be applied.	own dataset	10.1186/s12859-017-1843-1	2017	https://bmcbioinformatics.biomedcentral.com/articles/10.1186/s12859-017-1843-1	Manually added
Individualized Dynamics in the Gut Microbiota Precede Crohn's Disease Flares	Tzipi Braun, Ayelet Di Segni, Marina BenShoshan, Sandra Neuman, Nina Levhar, Michael Bubis, Orit Picard, Katya Sosnovski, Gilat Efroni, Sarit Farage Barhom, Efrat Glick Saar, Avishay Lahad, BatiaWeiss, Doron Yablecovitch, Adi Lahat, Rami Eliakim, Uri Kopylov, Shomron Ben-Horin, and Yael Haberman	Random Forest (Supervised learning method)	16S rRNA	CD (Crohn's disease)	Crohn's disease	Used a supervised learning random forest (RF) model to prioritize those taxa that best discriminating relpasers from nonrelapsers using samples.	own dataset	10.14309/ajg.0000000000000136	2019	https://pubmed.ncbi.nlm.nih.gov/30741738/	Manually added
A comprehensive study on predicting functional role of metagenomes using machine learning methods	Jyotsna Talreja Wassan, HaiyingWang, Fiona Browne, Huiru Zheng	Supervised Learning method comparison	16S rRNA, OTU tables	IBD (Crohn's disease, Ulcerative Colitis, collagenous colitis) vs healthy	Diet, microbes, IBD, Ulcerative colitis, collagenous colitis	Predicting gut microbiome functional role	H. Jonas et al., “Dynamics of the human gut microbiome in inflammatory bowel disease,” Nature Microbiology, vol. 2, 2017, Art. no. 17004.	10.1109/TCBB.2018.2858808	2018	https://ieeexplore.ieee.org/document/8417909	Manually added
Personalized Nutrition by Prediction of Glycemic Responses	David Zeevi,Tal Korem,Niv Zmora,Zamir Halpern,Eran Elinav,Eran Segal	Gradient Boosting	16s rRNA, shotgun metagenomics	Metabolic syndrome; type 2 diabetes				https://doi.org/10.1016/j.cell.2015.11.001	2015	https://www.cell.com/fulltext/S0092-8674(15)01481-6	Manually added
A human gut microbial gene catalogue established by metagenomic sequencing	Junjie Qin, Ruiqiang Li, Jeroen Raes, Manimozhiyan Arumugam, Kristoffer Solvsten Burgdorf, et al.	Unsupervised clustering	shotgun metagenomics	IBD, T2D	Type 2 diabetes	Selecting genetic markers for IBD	own dataset	10.1038/nature08821	2010	https://www.ncbi.nlm.nih.gov/pmc/articles/PMC3779803/	Manually added
Fecal source identification using random forest	Roguet A, Eren AM, Newton RJ, McLellan SL.	Random Forest	16S rRNA		Microbial source tracking, Clostridiales, Bacteroidales	Method to identify origin of samples and contamination	own dataset	10.1186/s40168-018-0568-3	2018	https://microbiomejournal.biomedcentral.com/articles/10.1186/s40168-018-0568-3	Manually added
Gastrointestinal microbiome signatures of pediatric patients with irritable bowel syndrome	Saulnier DM, Riehle K, Mistretta TA, Diaz MA, Mandal D, Raza S, Weidler EM, Qin X, Coarfa C, Milosavljevic A, Petrosino JF, Highlander S, Gibbs R, Lynch SV, Shulman RJ, Versalovic J.	Random Forest	16S rRNA	Irritable Bowel Syndrome	Irritable Bowel Syndrome	Signatures of IBS	own dataset	10.1053/j.gastro.2011.06.072	2011	https://www.gastrojournal.org/article/S0016-5085(11)00922-X/fulltext	Manually added
Bile microbiota in primary sclerosing cholangitis: Impact on disease progression and development of biliary dysplasia	Pedro Pereira ,Velma Aho,Johanna Arola,Sonja Boyd,Kalle Jokelainen,Lars Paulin,Petri Auvinen,Martti Färkkilä	Generalized linear models	16S rRNA	Sclerosing cholangitis	sclerosing cholangitis	Streptococcus may play a pathogenic role in the progression of the disease	own dataset	https://doi.org/10.1371/journal.pone.0182924	2017	https://journals.plos.org/plosone/article?id=10.1371/journal.pone.0182924#sec006	Manually added
Environmental biodiversity, human microbiota, and allergy are interrelated	Ilkka Hanski, Leena von Hertzen, Nanna Fyhrquist, Kaisa Koskinen, Kaisa Torppa, Tiina Laatikainen, Piia Karisola, Petri Auvinen, Lars Paulin, Mika J. Mäkelä, Erkki Vartiainen, Timo U. Kosunen, Harri Alenius, and Tari Haahtela	linear and logistic regression, and PCA.	16S rRNA	Allergy		In healthy, but not in atopic, individuals, IL-10 expression was positively correlated with the abundance of the gammaproteobacterial genus Acinetobacter on the skin	own dataset	https://doi.org/10.1073/pnas.1205624109	2012	https://www.pnas.org/content/109/21/8334#abstract-1	Manually added
Links between gut microbiome composition and fatty liver disease in a large population sample	Matti Olavi Ruuskanen, Fredrik Åberg, Ville Männistö, Aki S Havulinna, Guillaume Méric, Yang Liu, Rohit Loomba, Yoshiki Vázquez-Baeza, Anupriya Tripathi, Liisa M Valsta, Michael Inouye, Pekka Jousilahti, Veikko Salomaa, Mohit Jain, Rob Knight, Leo Lahti, Teemu J Niiranen	Gradient boosting	shotgun metagenomics (shallow)	Liver disease			FINRISK population cohort / own	https://doi.org/10.1101/2020.07.30.20164962	Preprint		Manually added
Early prediction of liver disease using conventional risk factors and gut microbiome-augmented gradient boosting	Yang Liu, Guillaume Meric, Aki S Havulinna, Shu Mei Teo, Matti Ruuskanen, Jon Sanders, Qiyun Zhu, Anupriya Tripathi, Karin Verspoor, Susan Cheng, Mo Jain, Pekka Jousilahti, Yoshiki Vazquez-Baeza, Rohit Loomba, Leo Lahti, Teemu Niiranen, Veikko Salomaa, Rob Knight, Michael Inouye	Gradient boosting	shotgun metagenomics (shallow)	Liver disease			FINRISK population cohort / own	https://doi.org/10.1101/2020.06.24.20138933	Preprint	https://doi.org/10.1101/2020.06.24.20138933	Manually added
A systematic machine learning and data type comparison yields metagenomic predictors of infant age, sex, breastfeeding, antibiotic usage, country of origin, and delivery type.	Le Goallec A, Tierney BT, Luber JM, Cofer EM, Kostic AD, Patel CJ (2020)	Elastic Net, RF,GBM, SVM, KNN,NB	shotgun metagenomics (shallow)		Diet, Breastfeeding status, prior antibiotic usage	Identification of biological features predictive of age, sex, breastfeeding status, historical antibiotic usage, country of origin, and delivery type	https://diabimmune.broadinstitute.org/diabimmune; EBI accession number ERP005989		2020	https://doi.org/10.1371/journal.pcbi.1007895	Manually added
Using data science for medical decision making case: role of gut microbiome in multiple sclerosis	Hasic Telalovic, J., Music, A.	Random Forest	16S rRNA	Multiple sclerosis			The datasets analyzed during the current study are available at the following repositories: 1. European Nucleotide Archive https://www.ebi.ac.uk/ena/data/view/PRJNA321051Accession numbers: MS samples (28) - SRX1759626, SRX1759627, SRX1759630, SRX1759632, SRX1759633, SRX1759641, SRX1759642, SRX1759653, SRX1759669 - SRX1759676, SRX1759697 - SRX1759699, SRX1759701 - SRX1759708, SRX1759719 Control/he…	https://doi.org/10.1186/s12911-020-01263-2	2020	https://bmcmedinformdecismak.biomedcentral.com/articles/10.1186/s12911-020-01263-2	Manually added
Colonic microbiota is associated with inflammation and host epigenomic alterations in inflammatory bowel disease.	Ryan FJ, Ahern AM, Fitzgerald RS, Laserna-Mendieta EJ, Power EM, Clooney AG, et al.	XgBoost	16S rRNA, host transcriptome, epigenome, genotype and dietary data	Inflammatory Bowel Disease	IBD			https://doi.org/10.1038/s41467-020-15342-5	2020	https://www.nature.com/articles/s41467-020-15342-5	Manually Added
